# Supplementary material for: Diagnostic structure of visual robotic inundated systems with fuzzy clustering membership correlation
Source: PeerJ Comput Sci. 2023 Dec 19;9:e1709. doi: 10.7717/peerj-cs.1709 (PMC10773856; doi:10.7717/peerj-cs.1709)
Supplement: Supplemental Information 1 [file peerj-cs-09-1709-s001.xlsx]

## Sheet: Sheet1
Objectivity(%)	Accuracy(%)		Expected reliability grade		Reliability (A-F)		Validations(0-10)	gut(%)		Credibility (1-6) centroid
100	100		A		6.31546		1	4		3.1687
90	100		A		6.25642		2	8		2.77063
80	100		B		5.51165		3	12		3.53897
70	100		C		4.00882		4	16		3.95831
60	100		D		3.94987		5	20		3.4269
50	100		D		3.81876		6	24		2.82553
40	100		E		2.11328		7	28		3.2732
30	100		E		1.72236		8	32		2.41711
20	100		F		1.61883		9	36		1.60724
10	100		F		1.52787		10	40		1.20333
0	100		F		1.48983		1	44		5.22967
100	0		D		3.9999		2	48		4.18756
100	10		D		4.00017		3	52		3.9437
100	20		C		4.00714		4	56		3.57272
100	30		C		4.31762		5	60		3.03209
100	40		C		4.92938		6	64		1.80747
100	50		B		4.99932		7	68		1.33639
100	60		B		5.08261		8	72		0.998302
100	70		B		5.84501		9	76		0.745783
100	80		A		6.22153		10	80		0.69916
100	90		A		6.28865		4	84		1.10062
50	50		D		3.33243		5	88		3.33461
80	20		D		3.83406		6	92		2.32074
60	40		D		3.3594		7	96		2.02411
40	60		E		1.85762		8	100		1.72363
20	80		E		1.46945		9	100		1.26998
